# Supplementary material
Source: ML conference proceedings conference paper supplement (https://proceedings.mlr.press/v54/piironen17a.html)
Supplement: Supplementary file 1 [file piironen17a-supp.pdf]

## SUPPLEMENTARY MATERIAL

## Non-Gaussian Likelihood

*Posterior approximation* Using the second order Taylor expansion for the log likelihood terms  $L_i(f_i, \phi)$  (where  $f_i = \boldsymbol{\beta}^\top \mathbf{x}_i$  and  $\phi$  denotes a possible dispersion parameter), we can approximate the posterior as (ch. 16.2, Gelman et al., 2013)

$$\begin{aligned} \log p(\boldsymbol{\beta} | \boldsymbol{\Lambda}, \tau, \phi, \mathcal{D}) \\ \approx \log p(\boldsymbol{\beta} | \boldsymbol{\Lambda}, \tau, \phi) - \sum_{i=1}^n \frac{1}{2\tilde{\sigma}_i^2} (\tilde{z}_i - f_i)^2 + \text{const.}, \end{aligned}$$

where

$$\tilde{z}_i = f_i - \frac{L'_i(f_i, \phi)}{L''_i(f_i, \phi)}, \quad \tilde{\sigma}_i^2 = -\frac{1}{L''_i(f_i, \phi)},$$

denote the location and variance of the Gaussian pseudo-observations. The derivatives are calculated w.r.t.  $f_i$  at the posterior mode  $\bar{f}_i = \bar{\boldsymbol{\beta}}^\top \mathbf{x}_i$ . Using these, the posterior (given the hyperparameters) is approximately

$$\begin{aligned} p(\boldsymbol{\beta} | \boldsymbol{\Lambda}, \tau, \phi, \mathcal{D}) &\approx \text{N}(\boldsymbol{\beta} | \bar{\boldsymbol{\beta}}, \boldsymbol{\Sigma}), \\ \bar{\boldsymbol{\beta}} &= \tau^2 \boldsymbol{\Lambda} \left( \tau^2 \boldsymbol{\Lambda} + (\mathbf{X}^\top \tilde{\boldsymbol{\Sigma}}^{-1} \mathbf{X})^{-1} \right)^{-1} \hat{\boldsymbol{\beta}}, \\ \boldsymbol{\Sigma} &= (\tau^{-2} \boldsymbol{\Lambda}^{-1} + \mathbf{X}^\top \tilde{\boldsymbol{\Sigma}}^{-1} \mathbf{X})^{-1}, \end{aligned}$$

where  $\tilde{\mathbf{z}} = (\tilde{z}_1, \dots, \tilde{z}_n)$ ,  $\tilde{\boldsymbol{\Sigma}} = \text{diag}(\tilde{\sigma}_1^2, \dots, \tilde{\sigma}_n^2)$  and  $\hat{\boldsymbol{\beta}} = (\mathbf{X}^\top \tilde{\boldsymbol{\Sigma}}^{-1} \mathbf{X})^{-1} \mathbf{X}^\top \tilde{\boldsymbol{\Sigma}}^{-1} \tilde{\mathbf{z}}$  (assuming the first inverse exists).

*Logistic regression* Consider the logistic regression model

$$p(y_i = 1 | f_i) = s(f_i) = \frac{1}{1 + \exp(-f_i)}.$$

The second derivative for the  $i$ th log-likelihood term is given by

$$\begin{aligned} L''_i(f_i) &= \left( \frac{y_i}{s(f_i)} - \frac{1 - y_i}{1 - s(f_i)} \right) s''(f_i) \\ &\quad - \left( \frac{y_i}{s(f_i)^2} + \frac{1 - y_i}{(1 - s(f_i))^2} \right) (s'(f_i))^2. \end{aligned}$$

If we now plug in the derivatives

$$\begin{aligned} s'(f_i) &= s(f_i)(1 - s(f_i)), \\ s''(f_i) &= s'(f_i)(1 - 2s(f_i)), \end{aligned}$$

after a few lines of straightforward algebra, we are left with

$$L''_i(f_i) = s(f_i)(s(f_i) - 1).$$

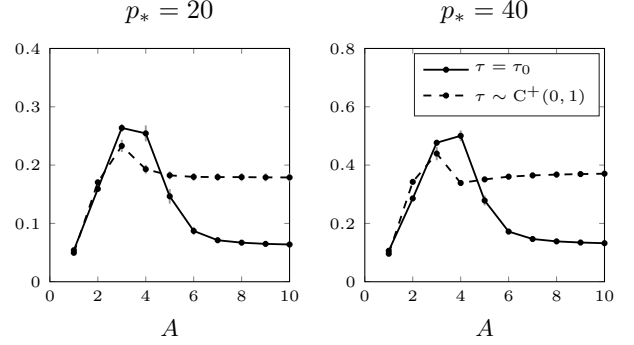

Figure 6: *Synthetic example*: Mean squared error (MSE) between the estimated and the true coefficient vector of length  $n = 400$  on average over 100 different data realizations. The true coefficient vector has either  $p_* = 20$  or  $p_* = 40$  elements with a nonzero value equal to  $A$  and the rest of the coefficients are set to zero.

This is a strictly negative function with minimum at  $s(f_i) = \frac{1}{2}$ , which occurs when  $f_i = 0$ . Thus also  $\tilde{\sigma}_i^2 = -1/L''_i(f_i)$  is minimized at  $f_i = 0$ . In other words, those points that lie on the classification boundary are the most informative ones, and the pseudo-variance for these points is

$$\tilde{\sigma}_i^2 = -\frac{1}{\frac{1}{2} \left(-\frac{1}{2}\right)} = 4.$$

This result serves as a useful reference value as discussed in Section 3.4.

## Additional experiments

We present here an additional synthetic experiment that could not fit to the main content of the paper. The example is taken from van der Pas et al. (2014). Consider model (9), where each  $y_i$  is generated by adding Gaussian noise with  $\sigma^2 = 1$  to the corresponding signal  $\beta_i$ . We generated 100 data realizations with  $n = 400$  and the true  $\boldsymbol{\beta}_*$  having either  $p_* = 20$  or  $p_* = 40$  nonzero entries equal to  $A = 1, 2, \dots, 10$  with the rest of the entries being zeros. We then computed the mean squared error (MSE) between the estimated posterior mean  $\bar{\boldsymbol{\beta}}$  and the true  $\boldsymbol{\beta}_*$  for the prior  $\tau \sim \text{C}^+(0, 1)$  and for  $\tau = \tau_0$ , where  $\tau_0$  is computed from Equation (17) with the oracle prior guess  $p_0 = p_*$ . The purpose of this setup is to further demonstrate how one could benefit from the prior knowledge about the sparsity of  $\boldsymbol{\beta}$  using our framework, provided such prior knowledge exists. Notice though, that also in the latter case  $\tau$  has a distribution because it depends on  $\sigma$  which is treated as an unknown parameter.

Figure 6 shows the MSE for the two priors for the different values of  $p_*$  and  $A$ . For both priors the error

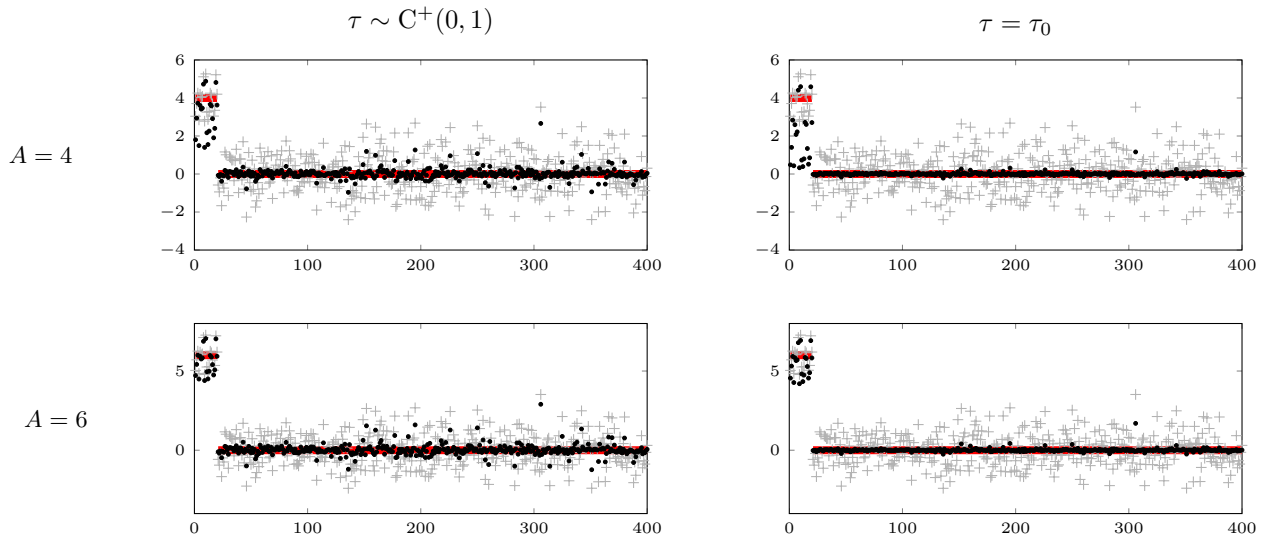

Figure 7: *Synthetic example*: An example data realization  $\mathbf{y}$  (crosses), posterior mean  $\bar{\beta}$  (dots) and the true signal  $\beta_*$  (red lines) for  $A = 4$  and  $A = 6$  when  $p_* = 20$ . In both cases the oracle value for  $\tau$  helps to shrink the zero components in  $\beta$  but also overshrinks the actual signals in the case  $A = 4$ .

is largest around  $A \approx 3.5$ , which is called the “universal threshold” by van der Pas et al. (2014). Below this threshold the nonzero components in  $\beta$  are too small to be detected and are thus shrunk too heavily towards zero which introduces error. For  $A = 4$  the oracle prior actually yields worse results due to this overshrinkage (see discussion below), but gives clearly superior results for larger  $A$ .

Figure 7 illustrates the data  $\mathbf{y}$  and the estimated coefficients  $\bar{\beta}$  for one particular data realization when  $A = 4$  and  $A = 6$ . In both cases the oracle choice of  $\tau$  helps to shrink the zero components in  $\beta$  towards zero, but for  $A = 4$  also overshrinks the nonzero components. The reason for the overshrinkage is that some observations  $y_i$  that correspond to zero signal ( $\beta_i = 0$ ) happen to have similar magnitude to the observations coming from an actual signal ( $\beta_i = A$ ), and thus these irrelevant components “steal” from the limited budget for  $m_{\text{eff}}$ . For this particular value of  $A$  (and  $p_*$ ) the overshrinkage of the actual signals happens to be worse in terms of MSE than undershrinkage of the zero components, and thus one would get better results by setting  $p_0$  to be slightly above the true  $p_*$  (results not shown). For  $A = 6$  the actual signals are large enough to be distinguished from zero, and the oracle selection of  $\tau$  yields substantially better estimate for  $\beta$ .

## Stan codes

The following shows the Stan code for the linear Gaussian model. We use the parametrization proposed by Peltola et al. (2014) (codes at <https://github.com/to-mi/stan-survival-shrinkage>) as it is more robust for sampling than the literal (3). Even with this parametrization we usually set `adapt_delta = 0.99` when calling Stan, as this can sometimes reduce the number of divergent transitions which can be an issue for the horseshoe prior (see Piironen and Vehtari, 2015).

In the code, both  $\tau$  and  $\lambda_j$  are given half- $t$  priors with the degrees of freedom and the scale defined by the user (the scale can be adjusted only for  $\tau$ , the local parameters  $\lambda_j$  have unit scale). Setting `nu_local = 1` corresponds to the horseshoe. `nu_global = 1` gives  $\tau$  a half-Cauchy prior, whereas fixing `nu_global` to some large value (say 100) would give  $\tau$  practically a half-normal prior. The scale for  $\tau$  is `scale_global*sigma`, so if we want to set this to be  $\tau_0 = \frac{p_0}{D-p_0} \frac{\sigma}{\sqrt{n}}$  (Eq. (16)), we should set `scale_global =  $\frac{p_0}{(D-p_0)\sqrt{n}}$` .

```

data {
  int<lower=0> n; // number of observations
  int<lower=0> d; // number of predictors
  vector[n] y; // outputs
  matrix[n,d] x; // inputs
  real<lower=0> scale_icept; // prior std for the intercept
  real<lower=0> scale_global; // scale for the half-t prior for tau
  // (tau0 = scale_global*sigma)
  real<lower=1> nu_global; // degrees of freedom for the half-t prior for tau
  real<lower=1> nu_local; // degrees of freedom for the half-t priors for lambdas
  // (nu_local = 1 corresponds to the horseshoe)
}

parameters {
  real beta0; // intercept
  real logsigma; // log of noise std

  // auxiliary variables that define the global and local parameters
  vector[d] z;
  real<lower=0> r1_global;
  real<lower=0> r2_global;
  vector<lower=0>[d] r1_local;
  vector<lower=0>[d] r2_local;
}

transformed parameters {
  real<lower=0> tau; // global shrinkage parameter
  vector<lower=0>[d] lambda; // local shrinkage parameters
  vector[d] beta; // regression coefficients
  vector[n] f; // latent values
  real sigma; // noise std

  sigma = exp(logsigma);
  lambda = r1_local .* sqrt(r2_local);
  tau = r1_global * sqrt(r2_global);
  beta = z .* lambda*tau;
  f = beta0 + x*beta;
}

model {
  // half-t priors for lambdas
  z ~ normal(0, 1);
  r1_local ~ normal(0.0, 1.0);
  r2_local ~ inv_gamma(0.5*nu_local, 0.5*nu_local);

  // half-t prior for tau
  r1_global ~ normal(0.0, scale_global*sigma);
  r2_global ~ inv_gamma(0.5*nu_global, 0.5*nu_global);

  // gaussian prior for the intercept
  beta0 ~ normal(0, scale_icept);

  // observation model
  y ~ normal(f, sigma);
}

```

The code for the logistic regression model is very similar, we simply remove the lines related to the noise deviation  $\sigma$ , and change the observation model and the type of the target variable data  $y$ . The scale for  $\tau$  is now simply `scale_global`. Thus, to follow our recommendation, we set `scale_global` =  $\tau_0 = \frac{p_0}{D-p_0} \frac{\sigma}{\sqrt{n}}$  (Eq. (16)), by plugging in  $\sigma = 2$  (Sec. 3.4).

```

data {
  int<lower=0> n;           // number of observations
  int<lower=0> d;           // number of predictors
  int<lower=0,upper=1> y[n]; // outputs
  matrix[n,d] x;          // inputs
  real<lower=0> scale_icept; // prior std for the intercept
  real<lower=0> scale_global; // scale for the half-t prior for tau
  real<lower=1> nu_global;  // degrees of freedom for the half-t priors for tau
  real<lower=1> nu_local;  // degrees of freedom for the half-t priors for lambdas
                          // (nu_local = 1 corresponds to the horseshoe)
}

parameters {
  real beta0; // intercept

  // auxiliary variables that define the global and local parameters
  vector[d] z;
  real<lower=0> r1_global;
  real<lower=0> r2_global;
  vector<lower=0>[d] r1_local;
  vector<lower=0>[d] r2_local;
}

transformed parameters {
  real<lower=0> tau; // global shrinkage parameter
  vector<lower=0>[d] lambda; // local shrinkage parameter
  vector[d] beta; // regression coefficients
  vector[n] f; // latent values

  lambda = r1_local .* sqrt(r2_local);
  tau = r1_global * sqrt(r2_global);
  beta = z .* lambda*tau;
  f = beta0 + x*beta;
}

model {
  // half-t priors for lambdas
  z ~ normal(0, 1);
  r1_local ~ normal(0.0, 1.0);
  r2_local ~ inv_gamma(0.5*nu_local, 0.5*nu_local);

  // half-t prior for tau
  r1_global ~ normal(0.0, scale_global);
  r2_global ~ inv_gamma(0.5*nu_global, 0.5*nu_global);

  // gaussian prior for the intercept
  beta0 ~ normal(0, scale_icept);

  // observation model
  y ~ bernoulli_logit(f);
}

```
